# Supplementary material
Source: publisher figshare collection journal article supplement (https://acs.figshare.com/ndownloader/files/5840109)
Supplement: Supplementary file 1 [file 5840109]

## Supporting Information

### Nickel(0)-Mediated Sequential Addition of Carbon Dioxide and Aryl Aldehydes into Terminal Allenes

Masanori Takimoto, Mitsunobu Kawamura, and Miwako Mori\*

*Graduate School of Pharmaceutical Sciences, Hokkaido University, Sapporo 060-0812, Japan*

mori@pharm.hokudai.ac.jp

**General Information.** All  $^1\text{H}$  NMR and  $^{13}\text{C}$  NMR were recorded on a JEOL EX-270 (270 MHz for  $^1\text{H}$ , 67.5 MHz for  $^{13}\text{C}$ ), or JEOL AL-400 (400 MHz for  $^1\text{H}$ , 100 MHz for  $^{13}\text{C}$ ) instrument in  $\text{CDCl}_3$  with tetramethylsilane as an internal standard otherwise mentioned. Data are reported as follows: chemical shift in ppm ( $\delta$ ), multiplicity (s = singlet, d = doublet, t = triplet, q = quartet, m = multiplet, br = broad signal), coupling constant (Hz), and integration. Infrared spectra (IR) were obtained on a Perkin Elmer 1605 FTIR spectrometer and absorptions are reported in reciprocal centimeters. Mass spectra were obtained on a JEOL JMS-700TZ (EI) or a JEOL JMS-FABmate (EI). Elemental Analyses were performed at the Center for Instrumental Analysis of Hokkaido University. Silica gel column chromatography was performed with Merck Silica Gel 60 (230-400 mesh ASTM).

**Materials or Methods.** All reactions were performed under an argon atmosphere using standard Schlenk techniques unless otherwise mentioned. THF (dehydrated, stabilizer-free) was obtained from Kanato Kagaku Co. and used without further purification. Carbon dioxide ( $\text{CO}_2$ ) gas was dried by passing through a column filled with Sicapent<sup>®</sup> and used without further purification. All other solvents and reagents were purified when necessary using standard procedures. Allenes **1a**,<sup>1</sup> **1b**, and **1c**<sup>2</sup> were prepared according to the method reported by Mayers.<sup>3</sup> Allenes **1d**<sup>4</sup> and **1e**, and **1f** were prepared according to Crabbe's method.<sup>5</sup> The spectral data for all new allenenes are described below.

**1-Benzoyloxy-4,5-hexadiene (1b).** IR (neat) 3062, 3029, 2937, 2854, 1955, 1495, 1452, 1364, 1103  $\text{cm}^{-1}$ ;  $^1\text{H}$  NMR (400 MHz,  $\text{CDCl}_3$ )  $\delta$  1.75 (tt,  $J = 7.0, 6.4$  Hz, 2 H), 2.10 (tdd,  $J = 7.0, 6.4, 3.2$  Hz, 2 H), 3.51 (t,  $J = 6.4$  Hz, 2 H), 4.50 (s, 2 H), 4.66 (dt,  $J = 6.8, 3.2$  Hz, 2 H), 5.11 (dt,  $J = 6.8, 6.4$  Hz, 1 H), 7.25-7.36 (m, 5 H);  $^{13}\text{C}$  NMR (100 MHz,  $\text{CDCl}_3$ )  $\delta$  25.00, 29.25, 69.60, 72.91, 75.00, 89.48, 127.29, 127.40, 128.13, 138.35, 207.99; LRMS (EI,  $m/z$ ) 97 ( $\text{M}^+-\text{Bn}$ ), 91; Anal Calcd for  $\text{C}_{13}\text{H}_{16}\text{O}$ : C, 82.94; H, 8.57. Found: C, 82.90; H, 8.67.

**2-Penta-3,4-dienylisoindole-1,3-dione (1e).** IR (nujol) 1955, 1709, 1498, 1436, 1399, 1374, 1328  $\text{cm}^{-1}$ ;  $^1\text{H}$  NMR (400 MHz,  $\text{CDCl}_3$ )  $\delta$  2.39 (dtt,  $J = 7.2, 7.2, 2.8$  Hz, 2 H), 3.78 (t,  $J = 7.2$  Hz, 2 H), 4.63 (dt,  $J = 6.8, 2.8$  Hz, 2 H), 5.10 (tt,  $J = 7.2, 6.8$  Hz, 1 H), 7.70-7.74 (m, 2 H), 7.83-7.87 (m, 2 H);  $^{13}\text{C}$  NMR (100 MHz,  $\text{CDCl}_3$ )  $\delta$  27.44, 37.51, 75.41, 86.23, 123.04, 131.85, 133.68, 167.94, 208.60; LRMS (EI,  $m/z$ ) 213 ( $\text{M}^+$ ), 160 ( $\text{PhthN}^+=\text{CH}_2$ ); Anal Calcd for  $\text{C}_{13}\text{H}_{11}\text{NO}_2$ : C, 73.23; H, 5.20; N, 6.57. Found: C, 73.20; H, 5.30; N, 6.60

**2-Hexa-4,5-dienylisoindole-1,3-dione (1f).** IR (nujor) 1949, 1770, 1694, 1468, 1442, 1402, 1024  $\text{cm}^{-1}$ ;  $^1\text{H}$  NMR (400 MHz,  $\text{CDCl}_3$ )  $\delta$  1.82 (tt,  $J = 7.6, 7.4$  Hz, 2 H), 2.07 (tdt,  $J = 7.4, 6.8, 3.2$  Hz, 2 H), 3.73 (t,  $J = 7.6$  Hz, 2 H), 4.68 (dt,  $J = 6.8, 3.2$  Hz, 2 H), 5.13 (tt,  $J = 6.8, 6.8$  Hz, 1 H), 7.70-7.72 (m, 2 H), 7.83-7.85 (m, 2 H);  $^{13}\text{C}$  NMR (100 MHz,  $\text{CDCl}_3$ )  $\delta$  25.34, 27.56, 37.32, 75.11, 88.53, 122.64, 131.57, 133.30, 167.70, 207.61; LRMS (EI,  $m/z$ ) 227 ( $\text{M}^+$ ), 160 ( $\text{PhthN}^+=\text{CH}_2$ ); Anal Calcd for  $\text{C}_{14}\text{H}_{13}\text{NO}_2$ : C, 73.99; H, 5.77; N, 6.16. Found: C, 74.05; H, 5.78; N, 6.15.

**Procedure for Nickel-Mediated Carboxylation of 1a.** To a stirred suspension of  $\text{Ni}(\text{cod})_2$  (160 mg, 0.580 mmol) in degassed THF (4.5 mL) in a Schlenk-type flask under an argon atmosphere, was added DBU (0.170 mL, 1.16 mmol) at 0  $^\circ\text{C}$ . The flask was immersed in a liquid nitrogen bath. After the mixture was frozen, the flask was evacuated ( $<0.005$  mmHg). A balloon filled with  $\text{CO}_2$  was attached to the flask, and then the frozen mixture was allowed to stand at an ambient temperature until it thawed. To the resulting pale yellow suspension was slowly added a solution of **1a** (100 mg, 0.580 mmol) in degassed THF (4.5 mL) at 0  $^\circ\text{C}$ . After the mixture was stirred at 0  $^\circ\text{C}$  for 2 hr, the reaction mixture was hydrolyzed with 10% HCl aq. at 0  $^\circ\text{C}$ , and the aqueous layer was extracted with EtOAc. The combined organic layer was washed with brine, dried over  $\text{Na}_2\text{SO}_4$ , and concentrated. The residue was treated with diazomethane in  $\text{Et}_2\text{O}$  at 0  $^\circ\text{C}$  according to the standard procedures. The obtained crude material was purified by silica gel column chromatography (hexane/EtOAc=10/1) to afford ester **4a** (80.2 mg, 59%).

**(2E)-5-Benzyloxy-2-methylpent-2-enoic acid methyl ester (4a).** IR (neat) 2947, 2859, 1715, 1653, 1436, 1264, 1092  $\text{cm}^{-1}$ ;  $^1\text{H}$  NMR (400 MHz,  $\text{CDCl}_3$ )  $\delta$  1.85 (d,  $J = 1.2$  Hz, 3 H), 2.50 (dt,  $J = 7.3, 6.8$  Hz, 2 H), 3.56 (t,  $J = 6.8$  Hz, 2 H), 3.74 (s, 3 H), 4.53 (s, 2 H), 6.79 (tq,  $J = 7.3, 1.2$  Hz, 1 H), 7.27-7.37 (m, 5 H);  $^{13}\text{C}$  NMR (100 MHz,  $\text{CDCl}_3$ )  $\delta$  12.80, 29.58, 51.81, 68.62, 73.02, 127.42, 127.42, 128.17, 128.93, 137.91, 138.38, 168.05; LRMS (EI,  $m/z$ ) 204 ( $\text{M}^+-\text{OMe}$ ), 175, 144, 128, 91; Anal Calcd for  $\text{C}_{14}\text{H}_{18}\text{O}_3$ : C, 71.77; H, 7.74. Found: C, 71.83; H, 7.73.

**Procedure for Nickel-Mediated Sequential Addition of  $\text{CO}_2$  and 5a into 1a.** To a stirred suspension of  $\text{Ni}(\text{cod})_2$  (79.0 mg, 0.290 mmol) in degassed THF (2.3 mL) in a Schlenk-type flask under an argon atmosphere, was added DBU (0.080 mL, 0.580 mmol) at 0  $^\circ\text{C}$ . The flask was immersed in a liquid nitrogen bath. After the mixture was frozen, the flask was evacuated ( $<0.005$  mmHg). A balloon filled with  $\text{CO}_2$  was attached to the flask, and then the frozen mixture was allowed to stand at an ambient temperature until it thawed. To the resulting pale yellow suspension was slowly added a solution of **1a** (50.5 mg, 0.290 mmol) in degassed THF (2.2 mL) at 0  $^\circ\text{C}$ . After the mixture was stirred at 0  $^\circ\text{C}$  for 2 hr, to this was added benzaldehyde **5a** (0.060 mL, 0.59 mmol). After 6 hr at room temperature, the reaction mixture was hydrolyzed with 10% HCl aq. at 0  $^\circ\text{C}$ , and the aqueous layer was extracted with EtOAc. The combined organic layer was washed with brine, dried over  $\text{Na}_2\text{SO}_4$ , and concentrated. The residue was treated with diazomethane in  $\text{Et}_2\text{O}$  at 0  $^\circ\text{C}$  according to the standard procedures. The obtained crude material was purified by silica gel column chromatography (hexane/EtOAc=5/1~1/1) to afford ester **6a** (46.8 mg, 47%).

**2-((1R\*)-3-Benzyloxy-1-((1R\*)-hydroxyphenylmethyl)propyl)acrylic acid methyl ester (6a).** IR (neat) 3432, 3029, 2950, 2861, 1718, 1624, 1452, 1438, 1364, 1270, 1206, 1151, 1099, 1028  $\text{cm}^{-1}$ ;  $^1\text{H}$  NMR (400 MHz,  $\text{CDCl}_3$ )  $\delta$  1.87 (dddd,  $J = 5.6$ ,

5.6, 9.2, 14.8 Hz, 1 H), 2.06 (dddd,  $J = 4.0, 6.0, 8.0, 14.8$  Hz, 1 H), 3.10-3.15 (m, 1 H), 3.30 (d,  $J = 3.5$  Hz, 1 H), 3.34-3.45 (m, 2 H), 3.70 (s, 3 H), 4.40 (s, 2 H), 4.88 (dd,  $J = 5.2, 3.2$  Hz, 1 H), 5.49 (s, 1 H), 6.19 (d,  $J = 1.2$  Hz, 1 H), 7.21-7.34 (m, 10 H);  $^{13}\text{C}$  NMR (100 MHz,  $\text{CDCl}_3$ )  $\delta$  28.42, 47.07, 52.04, 68.25, 72.79, 76.09, 126.30, 127.01, 127.06, 127.32, 127.45, 127.77, 128.08, 137.85, 140.25, 142.35, 167.61; LRMS (EI,  $m/z$ ) 309 ( $\text{M}^+ - \text{OMe}$ ), 245, 234, 91; Anal Calcd for  $\text{C}_{21}\text{H}_{24}\text{O}_4$ : C, 74.09; H, 7.11. Found: C, 74.03; H, 7.16.

**Procedure for Lactonization of 6a.** To a solution of **6a** (10.0 mg, 0.0270 mmol) in THF (1.5 mL), was added NaH (60% dispersion in mineral oil, 2.0mg, 0.050 mmol) at 0 °C. The resulting mixture was stirred at 0 °C for 2 hrs followed by stirring for 20 min at room temperature, then quenched by the addition of saturated aqueous solution of  $\text{NH}_4\text{Cl}$  at 0 °C, and extracted with ether. The combined organics were dried over anhydrous  $\text{Na}_2\text{SO}_4$ , filtered, and concentrated in vacuo. The residue was purified by silica gel column chromatography (hexane/EtOAc = 4/1) to afford lactone **7a** (8.8 mg, quant.).

**(4*R*\*,5*S*\*)-4-(2-Benzyloxyethyl)-3-methylene-5-phenyldihydrofuran-2-one (7a).** IR (neat) 3026, 2920, 2862, 1762, 1654, 1496, 1456, 1265, 1101  $\text{cm}^{-1}$ ;  $^1\text{H}$  NMR (400 MHz,  $\text{CDCl}_3$ )  $\delta$  1.31-1.45 (m, 2 H), 3.27-3.38 (m, 2 H), 3.51-3.58 (m, 1 H), 4.41 (s, 2 H), 5.52 (d,  $J = 2.4$  Hz, 1 H), 5.56 (d,  $J = 7.2$  Hz, 1 H), 6.32 (d,  $J = 2.4$  Hz, 1 H), 7.15-7.17 (m, 2 H), 7.25-7.38 (m, 8 H);  $^{13}\text{C}$  NMR (100 MHz,  $\text{CDCl}_3$ )  $\delta$  29.11, 41.23, 66.01, 73.01, 81.84, 122.29, 126.05, 127.66, 127.66, 128.23, 128.27, 128.35, 135.63, 137.73, 138.33, 170.02; LRMS (EI,  $m/z$ ) 308 ( $\text{M}^+$ ), 217, 202, 91; Anal. Calcd for  $\text{C}_{20}\text{H}_{20}\text{O}_3$ : C, 77.90; H, 6.54. found: C, 77.69; H, 6.70.

**Typical Procedure for Lactone Synthesis from 1a using Acid-Catalyzed Lactonization.** To a stirred suspension of  $\text{Ni}(\text{cod})_2$  (79.0 mg, 0.290 mmol) in degassed THF (2.3 mL) in a Schlenk-type flask under an argon atmosphere, was added DBU (0.080 mL, 0.580 mmol) at 0 °C. The flask was immersed in a liquid nitrogen bath. After the mixture was frozen, the flask was evacuated ( $<0.005$  mmHg). A balloon filled with  $\text{CO}_2$  was attached to the flask, and then the frozen mixture was allowed to stand at an ambient temperature until it thawed. To the resulting pale yellow suspension was slowly added a solution of **1a** (50.5 mg, 0.290 mmol) in degassed THF (2.2 mL) at 0 °C. After the mixture was stirred at 0 °C for 2 hr, to this was added benzaldehyde **5a** (0.060 mL, 0.59 mmol). After 6 hr at room temperature, the reaction mixture was hydrolyzed with 10% HCl aq. at 0 °C and the aqueous layer was extracted with EtOAc. The combined organic layer was washed with brine, dried over  $\text{Na}_2\text{SO}_4$ , and concentrated. The residue was filtered through a shot pad of silica gel (2 dia X 5 cm) using EtOAc/AcOH (100/1) as an eluent, and the solvents were evaporated in vacuo to afford a crude carboxylic acid.

To a solution of the crude carboxylic acid in benzene (12 mL), was added pyridinium *p*-toluenesulfonate (3.6 mg, 0.0140 mmol) and the mixture was refluxed for 2 hr with azeotropic removal of water. After cooling, the resulting mixture was concentrated in vacuo and the residue was purified by silica gel column chromatography (hexane/EtOAc = 4/1) to afford lactone **7a** (53.5 mg, 60% from **1a**).

**4-[(2*S*\*,3*R*\*)-3-(2-Benzyloxyethyl)-4-methylene-5-oxo-tetrahydrofuran-2-yl]benzoic acid methyl ester (7b).** IR (neat) 3030, 2951, 2859, 1771, 1723, 1613, 1436, 1281, 1109  $\text{cm}^{-1}$ ;  $^1\text{H}$  NMR (400 MHz,  $\text{CDCl}_3$ )  $\delta$  1.29-1.35 (m, 2 H), 3.30 (ddd,  $J = 5.0, 5.6, 14.8$  Hz, 1 H), 3.35 (ddd,  $J = 6.8, 9.2, 14.8$  Hz, 1 H), 3.58 (m, 1 H), 3.92 (s, 3 H), 4.41 (s, 2 H), 5.54 (d,  $J = 2.0$  Hz, 1 H), 5.62 (d,  $J = 7.2$  Hz, 1 H), 6.34 (d,  $J = 2.0$  Hz, 1 H), 7.23-7.34 (m, 7 H), 8.02 (d,  $J = 8.4$  Hz, 2 H);  $^{13}\text{C}$  NMR (100

MHz, CDCl<sub>3</sub>)  $\delta$  28.96, 41.07, 52.23, 65.71, 72.98, 81.10, 122.81, 125.94, 127.61, 127.61, 128.21, 129.55, 129.94, 137.57, 137.70, 140.59, 166.07, 169.56; LRMS (EI,  $m/z$ ) 366 ( $M^+$ ), 335, 307, 275, 260, 91; Anal. Calcd for C<sub>21</sub>H<sub>20</sub>O<sub>5</sub>: C, 72.12; H, 6.05. Found: C, 71.94; H, 6.25

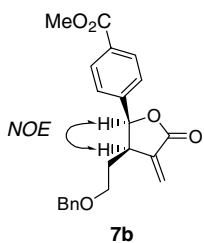

**(4R\*,5S\*)-4-(2-Benzyloxyethyl)-3-methylene-5-(4-trifluoromethylphenyl)dihydrofuran-2-one (7c).** IR (neat) 2930, 2863, 1772, 1326, 1166, 1123, 1067; <sup>1</sup>H NMR (400 MHz, CDCl<sub>3</sub>)  $\delta$  1.38-1.44 (m, 1 H), 1.64-1.72 (m, 1 H), 3.29-3.39 (m, 2 H), 3.56-3.61 (m, 1 H), 4.42 (s, 2 H), 5.54 (d,  $J$  = 2.0 Hz, 1 H), 5.62 (d,  $J$  = 7.2 Hz, 1 H), 6.34 (d,  $J$  = 2.4 Hz, 1 H), 7.23-7.40 (m, 5 H), 7.36 (d,  $J$  = 8.4 Hz, 2 H), 7.60 (d,  $J$  = 8.4 Hz, 2 H); <sup>13</sup>C NMR (100 MHz, CDCl<sub>3</sub>)  $\delta$  28.97, 41.19, 65.70, 73.11, 80.95, 123.08, 123.64, 125.37, 126.36, 127.74, 127.78, 128.31, 130.39, 137.54, 137.60, 139.66, 169.53; LRMS (EI,  $m/z$ ) 376 ( $M^+$ ), 285, 270, 91; Anal Calcd for C<sub>21</sub>H<sub>19</sub>F<sub>3</sub>O<sub>3</sub>: C, 67.02; H, 5.09. Found C 67.16; H 5.27.

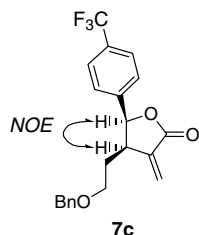

**(4R\*, 5S\*)-4-(2-Benzyloxy-ethyl)-5-(4-fluoro-phenyl)-3-methylene-dihydro-furan-2-one (7d)** IR (neat) 3058, 3027, 2834, 2863, 1769, 1608, 1512, 1229, 1104 cm<sup>-1</sup>; <sup>1</sup>H NMR (400 MHz, CDCl<sub>3</sub>)  $\delta$  1.29-1.45 (m, 2 H), 3.27-3.56 (m, 2 H), 3.49-3.56 (m, 1 H), 4.42 (s, 2 H), 5.53 (d,  $J$  = 2.0 Hz, 1 H), 5.55 (d,  $J$  = 7.6 Hz, 1 H), 6.32 (d,  $J$  = 2.0 Hz, 1 H), 6.99-7.07 (m, 2 H), 7.11-7.16 (m, 2 H), 7.22-7.39 (m, 5 H); <sup>13</sup>C NMR (100 MHz, CDCl<sub>3</sub>)  $\delta$  29.07 (CH<sub>2</sub>), 41.22 (CH), 65.95 (CH<sub>2</sub>), 73.00 (CH<sub>2</sub>), 81.20 (CH), 115.39 (d,  $J_{CF}$  = 21.3 Hz, CH), 122.45 (CH<sub>2</sub>), 127.66 (CH), 127.66 (CH), 127.83 (d,  $J_{CF}$  = 8.3 Hz, CH), 128.25 (CH), 131.48 (d,  $J_{CF}$  = 3.5 Hz, C), 137.65 (C), 138.06 (C), 162.22 (d,  $J_{CF}$  = 245.4 Hz, CF), 169.75 (C); LRMS (EI,  $m/z$ ) 326 ( $M^+$ ), 281, 235, 220, 91; Anal Calcd for C<sub>20</sub>H<sub>19</sub>FO<sub>3</sub>: C, 73.60; H, 5.87. Found: C, 73.59; H, 5.92.

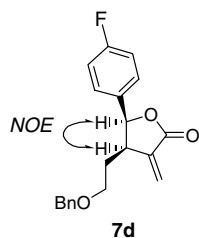

**(4*R*\*,5*S*\*)-4-(2-Benzoyloxyethyl)-3-methylene-5-*p*-tolylidihydrofuran-2-one (7e).** IR (neat) 3029, 2922, 2862, 1767, 1662, 1454, 1267, 1116  $\text{cm}^{-1}$ ;  $^1\text{H}$  NMR (400 MHz,  $\text{CDCl}_3$ )  $\delta$  1.32-1.48 (m, 2 H), 2.34 (s, 3 H), 3.27-3.38 (m, 2 H), 3.49-3.35 (m, 1 H), 4.41 (s, 2 H), 5.51 (d,  $J = 2.0$  Hz, 1 H), 5.53 (d,  $J = 7.2$  Hz, 1 H), 6.31 (d,  $J = 2.4$  Hz, 1 H), 7.03 (d,  $J = 7.6$  Hz, 2 H), 7.13 (d,  $J = 7.6$  Hz, 2 H), 7.28-7.38 (m, 5 H);  $^{13}\text{C}$  NMR (100 MHz,  $\text{CDCl}_3$ )  $\delta$  221.32, 29.10, 41.20, 66.10, 72.96, 81.86, 121.97, 126.00, 127.60, 127.60, 128.22, 128.97, 132.62, 137.74, 137.97, 138.46, 170.07; LRMS (EI,  $m/z$ ) 322 ( $\text{M}^+$ ), 231, 201, 91; Anal Calcd for  $\text{C}_{21}\text{H}_{22}\text{O}_3$ : C, 78.23; H, 6.88. Found: C, 78.03; H, 6.91.

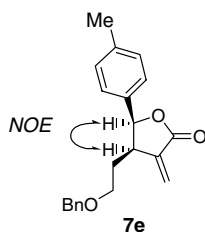

**(4*R*\*,5*S*\*)-4-(2-Benzoyloxyethyl)-5-(4-methoxyphenyl)-3-methylenedihydrofuran-2-one (7f).** IR (neat) 3030, 2935, 2861, 1765, 1612, 1515, 1251, 1115  $\text{cm}^{-1}$ ;  $^1\text{H}$  NMR (400 MHz, benzene- $d_6$ )  $\delta$  1.11 (dddd,  $J = 5.2, 5.2, 8.8, 14.4$  Hz, 1 H), 1.19 (dddd,  $J = 5.6, 6.0, 8.4, 14.4$  Hz, 1 H), 2.92 (ddd,  $J = 5.2, 6.0, 14.8$  Hz, 1 H), 2.96 (ddd,  $J = 5.2, 8.4, 14.8$  Hz, 1 H), 3.06 (dddd,  $J = 1.2, 2.4, 5.6, 7.2, 8.8$  Hz, 1 H), 3.22 (s, 3 H), 4.10 (s, 2 H), 5.04 (d,  $J = 7.2$  Hz, 1 H), 5.09 (d,  $J = 1.2$  Hz, 1 H), 6.25 (d,  $J = 2.4$  Hz, 1 H), 6.64 (d,  $J = 8.8$  Hz, 2 H), 6.86 (d,  $J = 8.8$  Hz, 2 H), 7.06-7.25 (m, 5 H);  $^{13}\text{C}$  NMR (100 MHz,  $\text{CDCl}_3$ )  $\delta$  29.15, 41.29, 55.32, 66.15, 73.00, 81.80, 113.75, 113.93, 127.93, 127.46, 127.53, 127.65, 128.19, 128.25, 137.74, 138.52, 159.29; LRMS (EI,  $m/z$ ) 338 ( $\text{M}^+$ ), 247, 202, 91; Anal Calcd for  $\text{C}_{21}\text{H}_{22}\text{O}_4$ : C, 74.54; H, 6.55. Found: C, 74.58; H, 6.55.

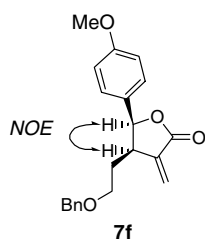

**(4*R*\*,5*S*\*)-4-(2-Benzoyloxyethyl)-3-methylene-5-(3-methylphenyl)dihydrofuran-2-one (7g).** IR (neat) 3030, 2921, 2862, 1769, 1267, 1104  $\text{cm}^{-1}$ ;  $^1\text{H}$  NMR (400 MHz,  $\text{CDCl}_3$ )  $\delta$  1.32-1.44 (m, 2 H), 2.32 (s, 3 H), 3.27-3.37 (m, 2 H), 3.48-3.55 (m, 1 H), 4.41 (s, 2 H), 5.51 (d,  $J = 2.4$  Hz, 1 H), 5.52 (d,  $J = 7.2$  Hz, 1 H), 6.31 (d,  $J = 2.4$  Hz, 1 H), 6.94-6.96 (m, 2 H), 7.10-7.37 (m, 7 H);  $^{13}\text{C}$  NMR (100 MHz,  $\text{CDCl}_3$ )  $\delta$  21.60, 29.07, 41.13, 66.04, 72.93, 81.84, 122.11, 123.09, 126.57, 127.59, 127.59, 128.16, 128.21, 128.91, 135.51, 137.70, 137.98, 138.37, 170.02; LRMS (EI,  $m/z$ ) 322 ( $\text{M}^+$ ), 276, 231, 91; Anal Calcd for  $\text{C}_{21}\text{H}_{22}\text{O}_3$ : C, 78.23; H, 6.88. Found: C, 78.39; H, 6.82.

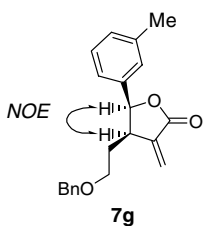

**(4R\*,5S\*)-4-(2-Benzyloxyethyl)-3-methylene-5-(3-trifluoromethylphenyl)dihydrofuran-2-one (7h).** IR (neat) 3031, 2925, 2863, 1773, 1454, 1331, 1125  $\text{cm}^{-1}$ ;  $^1\text{H}$  NMR (400 MHz,  $\text{CDCl}_3$ )  $\delta$  1.24-1.38 (m, 2 H), 3.29-3.39 (m, 2 H) 3.56-3.62 (m, 1 H), 4.42 (s, 2 H), 5.55 (d,  $J = 2.0$  Hz, 1 H), 5.62 (d,  $J = 7.2$  Hz, 1 H), 6.35 (d,  $J = 2.4$  Hz, 1 H), 7.29-7.39 (m, 6 H), 7.47-7.60 (m, 3 H);  $^{13}\text{C}$  NMR (100 MHz,  $\text{CDCl}_3$ )  $\delta$  28.99 ( $\text{CH}_2$ ), 41.18 (CH), 65.74 ( $\text{CH}_2$ ), 73.09 ( $\text{CH}_2$ ), 80.98 (CH), 122.94 (q,  $J_{\text{CF}} = 3.5$  Hz, CH), 123.05 ( $\text{CH}_2$ ), 123.60 (q,  $J_{\text{CF}} = 269.7$  Hz,  $\text{CF}_3$ ), 125.07 (q,  $J_{\text{CF}} = 3.6$  Hz, CH), 127.70 (CH), 127.72 (CH), 128.29 (CH), 128.93 (CH), 129.28 (CH), 130.81 (q,  $J_{\text{CF}} = 32.7$  Hz, C), 136.80 (C), 137.56 (C), 137.62 (C), 169.47 (C); LRMS (EI,  $m/z$ ) 376 ( $\text{M}^+$ ), 285, 299, 91; Anal Calcd for  $\text{C}_{21}\text{H}_{19}\text{F}_3\text{O}_3$ : C, 67.02; H, 5.09. Found: C, 67.21; H, 5.09.

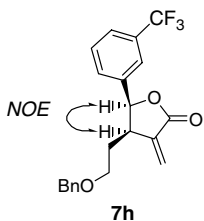

**(4R\*,5S\*)-4-(3-Benzyloxypropyl)-3-methylene-5-phenyldihydrofuran-2-one (8).** IR (neat) 3060, 3031, 2942, 2859, 1767, 1453, 1265, 1100  $\text{cm}^{-1}$ ;  $^1\text{H}$  NMR (400 MHz,  $\text{CDCl}_3$ )  $\delta$  1.01-1.15 (m, 1 H), 1.24-1.34 (m, 1 H), 1.39-1.50 (m, 1 H), 1.52-1.62 (m, 1 H), 3.25-3.30 (m, 3 H), 4.38 (s, 2 H), 5.59 (d,  $J = 7.2$  Hz, 1 H), 5.63 (d,  $J = 2.0$  Hz, 1 H), 6.34 (d,  $J = 2.4$  Hz, 1 H), 7.20-7.38 (m, 10 H);  $^{13}\text{C}$  NMR (100 MHz,  $\text{CDCl}_3$ )  $\delta$  25.91, 26.58, 44.35, 69.53, 72.70, 81.95, 122.02, 126.00, 127.23, 127.30, 128.08, 128.18, 128.25, 135.56, 137.96, 138.69, 170.08; LRMS (EI,  $m/z$ ) 231 ( $\text{M}^+ - \text{Bn}$ ), 216, 91; Anal Calcd for  $\text{C}_{21}\text{H}_{22}\text{O}_3$ : C, 78.23; H, 6.88. Found: C, 78.21; H, 6.96.

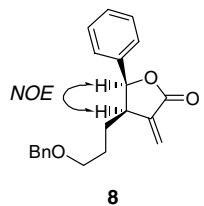

**(4R\*,5S\*)-3-Methylene-4-phenethyl-5-phenyldihydrofuran-2-one (9).** IR (nujol) 1763, 1654, 1455, 1243  $\text{cm}^{-1}$ ;  $^1\text{H}$  NMR (400 MHz,  $\text{CDCl}_3$ )  $\delta$  1.37 (dddd,  $J = 13.6, 10.0, 8.6, 6.4$  Hz, 1 H), 1.58 (dddd,  $J = 13.6, 10.0, 7.6, 6.0$  Hz, 1 H), 2.42 (ddd,  $J = 14.0, 10.0, 6.4$  Hz, 1 H), 2.51 (ddd,  $J = 14.0, 10.0, 6.0$  Hz, 1 H), 3.27 (dddd,  $J = 10.0, 8.6, 7.2, 2.4, 2.4$  Hz, 1 H), 5.60 (d,  $J = 7.2$  Hz, 1 H), 5.63 (d,  $J = 2.4$  Hz, 1 H), 6.37 (d,  $J = 2.4$  Hz, 1 H), 6.91-7.40 (m, 10 H);  $^{13}\text{C}$  NMR (100 MHz,  $\text{CDCl}_3$ )  $\delta$  30.95, 32.51, 43.82, 81.95, 121.96, 125.91, 126.17, 127.95, 128.24, 128.24, 128.37, 128.41, 135.51, 138.70,

140.43, 170.02; LRMS (EI,  $m/z$ ) 278 (M<sup>+</sup>), 172, 44; Anal Calcd for C<sub>19</sub>H<sub>18</sub>O<sub>2</sub>: C, 81.99; H, 6.52. Found: C, 81.86; H, 6.67.

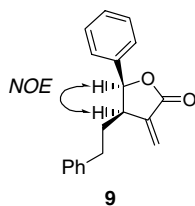

**(4*R*\*,5*S*\*)-4-(2-Cyclohexylethyl)-3-methylene-5-phenyldihydrofuran-2-one (10).** IR (neat) 3033, 2922, 2850, 176, 1663, 1497, 1453, 1266, 1146, 1109; <sup>1</sup>H NMR (400 MHz, CDCl<sub>3</sub>) δ 0.64-0.74 (m, 2 H), 0.97-1.28 (m, 8 H), 1.40-1.62 (m, 5 H), 3.47-3.22 (m, 1 H), 5.59-5.60 (m, 1 H), 5.60 (d,  $J$  = 2.0 Hz, 1 H), 6.34 (d,  $J$  = 2.4 Hz, 1 H), 7.20-7.22 (m, 2 H), 7.30-7.40 (m, 3 H); <sup>13</sup>C NMR (100 MHz, CDCl<sub>3</sub>) δ 26.34, 26.35, 26.44, 26.64, 33.16, 33.24, 34.16, 37.52, 44.88, 82.20, 121.69, 126.13, 126.15, 128.21, 135.69, 138.94, 170.32; LRMS (EI,  $m/z$ ) 284 (M<sup>+</sup>), 178, 82; Anal. Calcd for C<sub>19</sub>H<sub>24</sub>O<sub>2</sub>: C, 80.24; H, 8.51. Found: C, 80.15; H, 8.54.

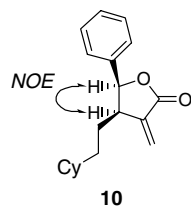

**2-{2-[(2*S*\*,3*R*\*)-4-Methylene-5-oxo-2-phenyltetrahydrofuran-3-yl]ethyl}isoindole-1,3-dione (11).** IR (nujor) 2923, 2854, 1760, 1709, 1458, 1376, 1269, 1155, 1114 cm<sup>-1</sup>; <sup>1</sup>H NMR (400 MHz, CDCl<sub>3</sub>) δ 1.29 (dddd,  $J$  = 13.8, 6.7, 6.7, 6.7 Hz, 1 H), 1.72 (dddd,  $J$  = 13.8, 6.7, 6.7, 6.7 Hz, 1 H), 3.28-3.33 (m, 1 H), 3.55-3.60 (m, 2 H), 5.72 (d,  $J$  = 7.6 Hz, 1 H), 5.85 (d,  $J$  = 2.6 Hz, 1 H), 6.42 (d,  $J$  = 2.6 Hz, 1 H), 7.25-7.27 (m, 2 H), 7.34-7.39 (m, 3 H), 7.71-7.73 (m, 2 H), 7.82-7.84 (m, 2 H); <sup>13</sup>C NMR (100 MHz, CDCl<sub>3</sub>) δ 28.12, 35.08, 41.64, 81.65, 122.54, 123.13, 126.31, 128.51, 128.60, 131.59, 133.91, 135.33, 137.82, 167.88, 169.73; LRMS (EI,  $m/z$ ) 347 (M<sup>+</sup>), 241, 213; Anal Calcd for C<sub>21</sub>H<sub>17</sub>NO<sub>4</sub>: C, 72.61; H, 4.93; N, 4.03. Found: C, 72.59; H, 4.96; N, 4.02.

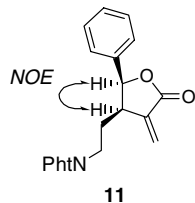

**2-{3-[(2*S*\*,3*R*\*)-4-Methylene-5-oxo-2-phenyltetrahydrofuran-3-yl]propyl}isoindole-1,3-dione (12).** IR (neat) 3063, 3033, 2941, 2867, 1770, 1715, 1397, 1266, 1149, 1113 cm<sup>-1</sup>; <sup>1</sup>H NMR (400 MHz, CDCl<sub>3</sub>) δ 0.96-1.05 (8m, 1 H), 1.29-1.37 (m, 1 H), 1.47-1.58 (m, 1 H), 1.58-1.69 (m, 1 H), 3.29-3.35 (m, 1 H), 3.50 (ddd,  $J$  = 14.0, 6.8, 5.0 Hz, 2 H), 5.60 (d,  $J$  = 7.2

Hz, 1 H), 5.66 (d,  $J = 2.0$  Hz, 1 H), 6.36 (d,  $J = 2.4$  Hz, 1 H), 7.10-7.28 (m, 5 H), 7.70-7.74 (m, 2 H), 7.77-7.81 (m, 2 H);  $^{13}\text{C}$  NMR (100 MHz,  $\text{CDCl}_3$ )  $\delta$  25.44, 26.32, 37.13, 43.65, 81.72, 122.32, 122.93, 125.88, 128.11, 128.17, 131.65, 133.66, 135.21, 138.19, 167.71, 169.89; LRMS (EI,  $m/z$ ) 361 ( $\text{M}^+$ ), 211, 173, 160; Anal Calcd for  $\text{C}_{22}\text{H}_{19}\text{NO}_4$ : C, 73.12; H, 5.30; N, 3.88. Found: C, 72.95; H, 5.47; N, 3.75.

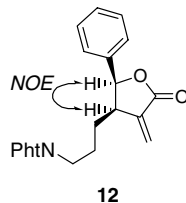

**Registry Number:** 203677-52-0 (**1a**); 40339-21-7 (**1c**); 260554-38-9 (**1d**).

## References

1. Oh, C. H.; Yoo, H. S.; Jung, S. H. *Chem. Lett.* **2001**, *31*, 1288.
2. Ohno, H.; Miyamura, K.; Tanaka, T.; Oishi, H.; Toda, A.; Takemoto, Y.; Fuji, N.; Ibuka, T. *J. Org. Chem.* **2002**, *67*, 1359.
3. (a) Myers, A. G.; Zheng, Bin. *J. Am. Chem. Soc.* **1996**, *118*, 4492. (b) Myers, A. G.; Zheng, B.; Movassaghi, M. *J. Org. Chem.* **1997**, *62*, 7507.
4. Ahmed, M. Arnauld, T.; Barrett, A. G.; Braddock, D. C.; Flack, K.; Procopiou, P. A. *Org. Lett.* **2000**, *2*, 551.
5. (a) Crabbé, P.; Fillion, H.; André, D.; Luche, J.-L. *J. Chem. Soc., Chem. Commun.* **1979**, 859. (b) Searles, S.; Li, Y.; Nassim, B.; Lopes, M.-T. R.; Tran, P. T.; Crabbé, P. *J. Chem. Soc., Perkin Trans I* **1984**, 747. (c) Crabbé, P.; Nassim, B.; Lopes, M.-T. R. *Organic Synthesis*; Wiley: New York, 1990; Collect. Vol. VII, p 276.
